# Supplementary material for: 2D Ruddlesden–Popper perovskite sensitized SnP2S6 ultraviolet photodetector enabling high responsivity and fast speed
Source: Royal Society of Chemistry journal article supplement (doi:10.1039/d2nh00466f), 2022-11-18
Supplement: d2nh00466f1.pdf [file d2nh00466f1.pdf]

## Electronic Supplementary Information for

### 2D Ruddlesden-Popper Perovskite Sensitized SnP<sub>2</sub>S<sub>6</sub> Ultraviolet

### Photodetector Enabling High Responsivity and Fast Speed

Yue Zhang,<sup>a</sup> Fakun Wang,<sup>b</sup> Xuan Zhao,<sup>a</sup> Xin Feng,<sup>a</sup> Na Zhang,<sup>a</sup> Fangfang Xia,<sup>a</sup> Ying Ma,<sup>a</sup>  
Huiqiao Li<sup>a</sup> and Tianyou Zhai\*<sup>a</sup>

<sup>a</sup>. *State Key Laboratory of Materials Processing and Die & Mould Technology, School of Materials Science and Engineering, Huazhong University of Science and Technology, Wuhan 430074, P. R. China.*

<sup>b</sup>. *School of Electrical and Electronic Engineering, Nanyang Technological University, Singapore 639798, Singapore.*

\*Email: [zhaity@hust.edu.cn](mailto:zhaity@hust.edu.cn)

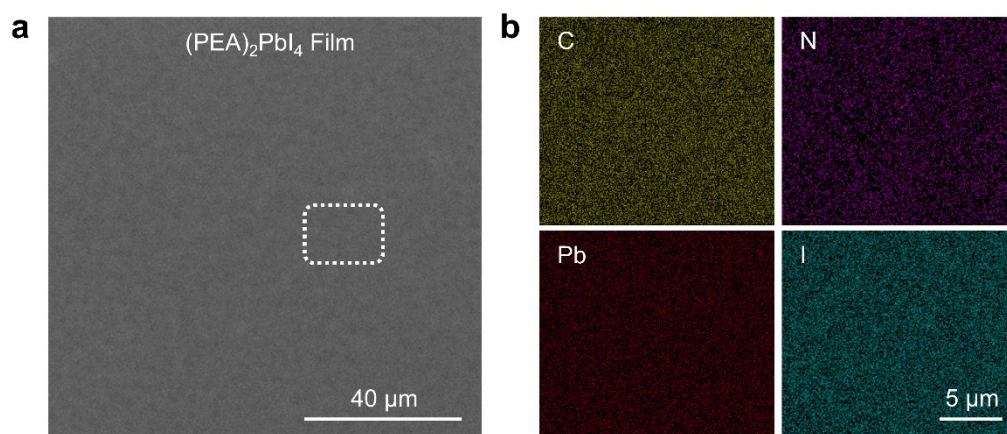

**Fig. S1 (a) SEM image of (PEA)<sub>2</sub>PbI<sub>4</sub> layer. (b) EDS mapping (C, N, Pb and I elements) of the white box area in (a).**

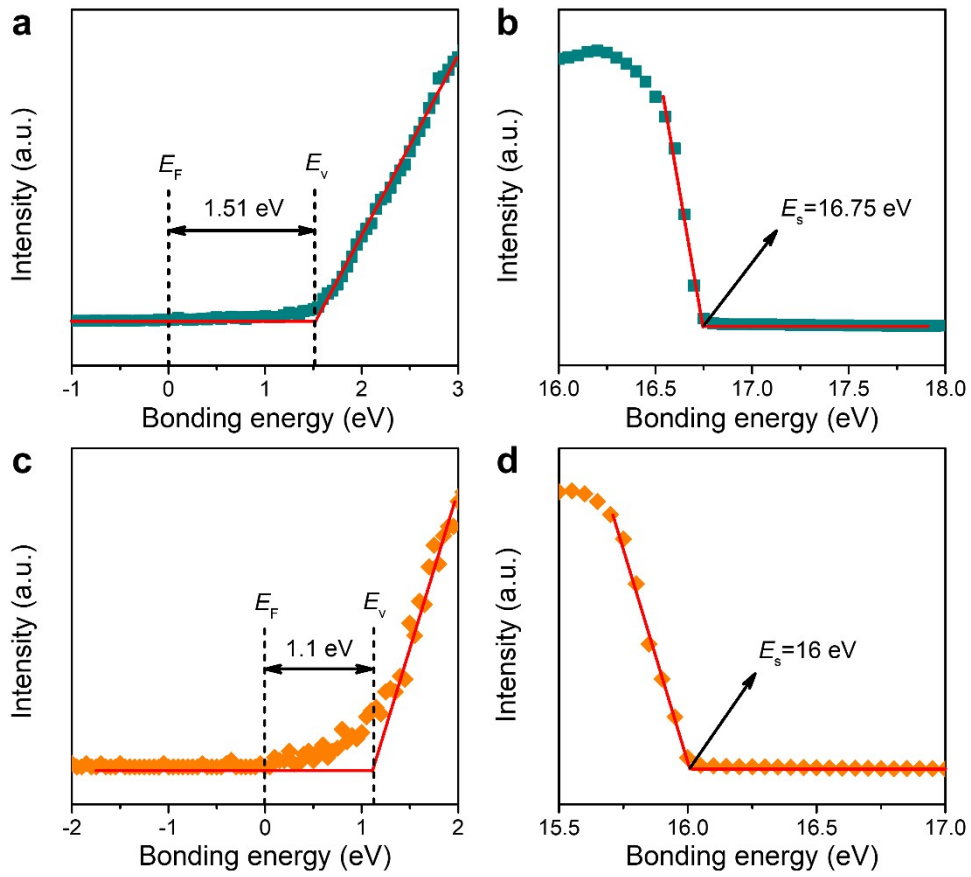

**Fig. S2 UPS of (a-b)  $\text{SnP}_2\text{S}_6$  and (c-d)  $(\text{PEA})_2\text{PbI}_4$ , displaying the valence band spectra and secondary electron cut-off edge.**

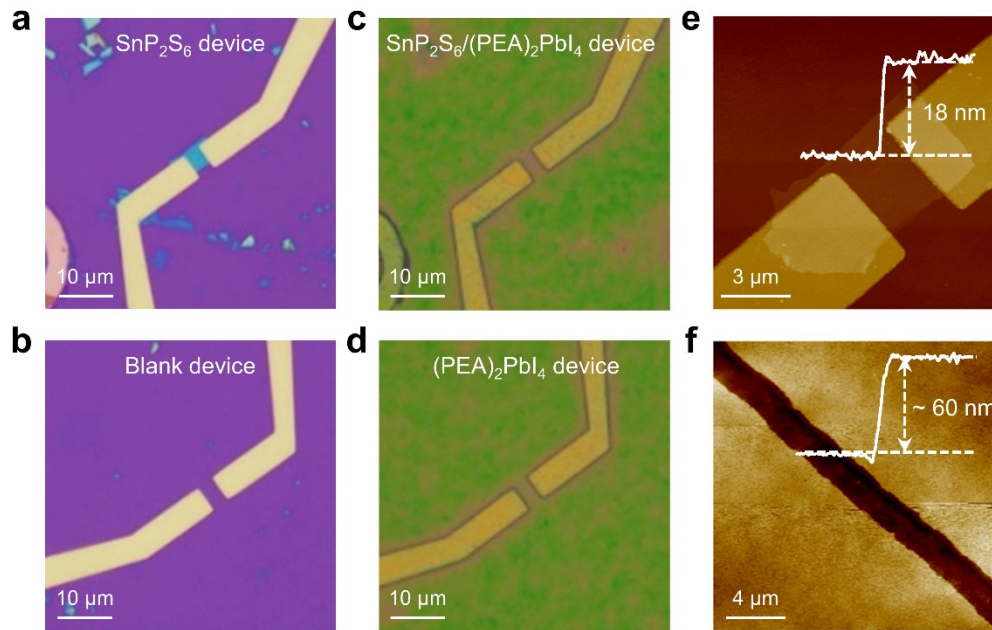

**Fig. S3 (a-b) Optical images of SnP<sub>2</sub>S<sub>6</sub> device and blank device. (c-d) Optical images of SnP<sub>2</sub>S<sub>6</sub> device and blank device after spin-coating (PEA)<sub>2</sub>PbI<sub>4</sub>. (e-f) AFM images of SnP<sub>2</sub>S<sub>6</sub> device and (PEA)<sub>2</sub>PbI<sub>4</sub> film.**

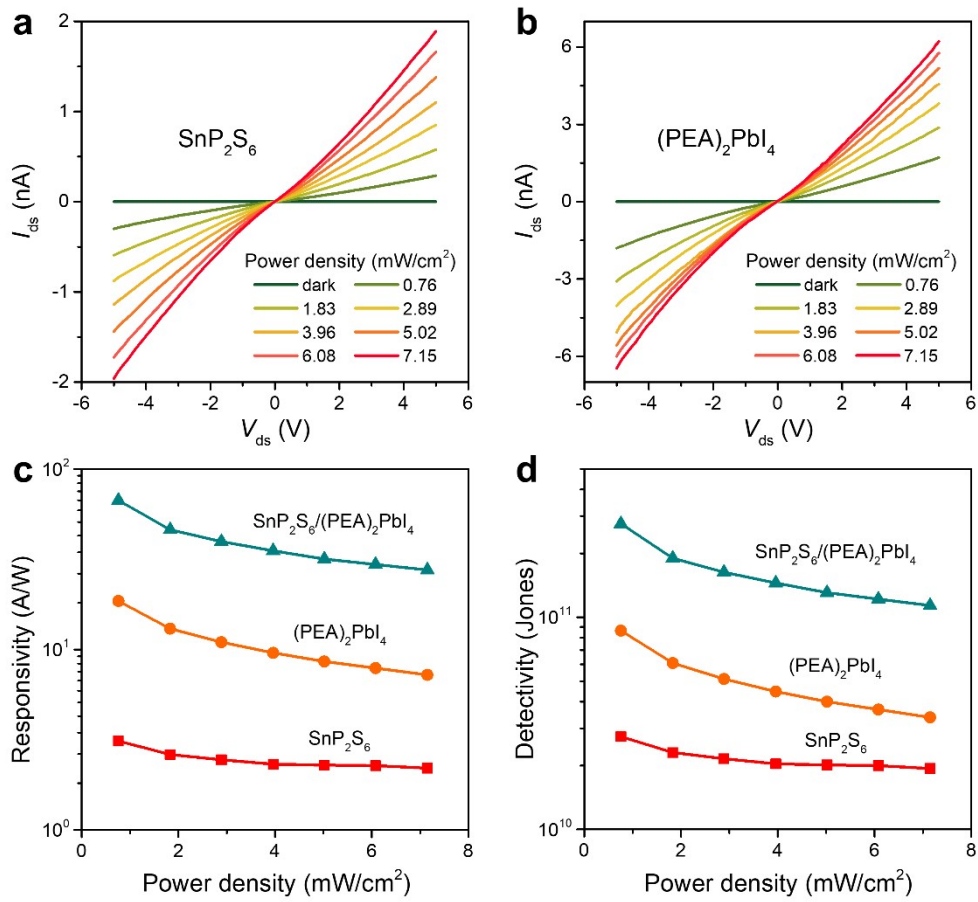

**Fig. S4 (a-b)  $I_{ds}$ - $V_{ds}$  curves of pure  $\text{SnP}_2\text{S}_6$  device and pure  $(\text{PEA})_2\text{PbI}_4$  device in the dark and under 365 nm laser illumination with various power densities. (c-d) Responsivity and detectivity comparison of  $\text{SnP}_2\text{S}_6$ ,  $(\text{PEA})_2\text{PbI}_4$  and  $\text{SnP}_2\text{S}_6/(\text{PEA})_2\text{PbI}_4$  heterojunction at  $V_{ds} = 5$  V.**

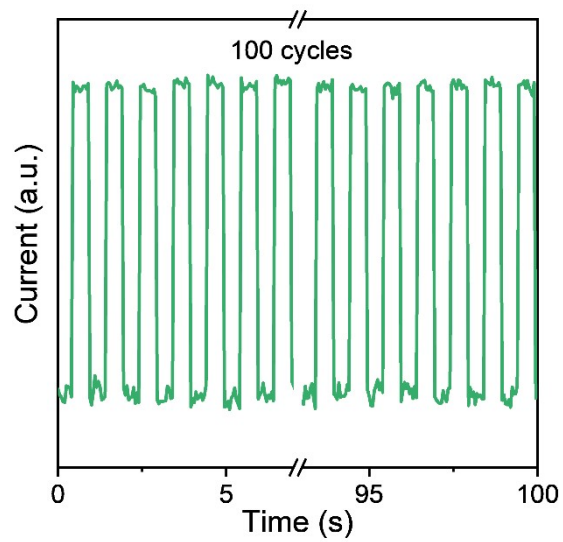

**Fig. S5 Time resolved photoresponse of the heterojunction device after 2-weeks storage in the glove box.**

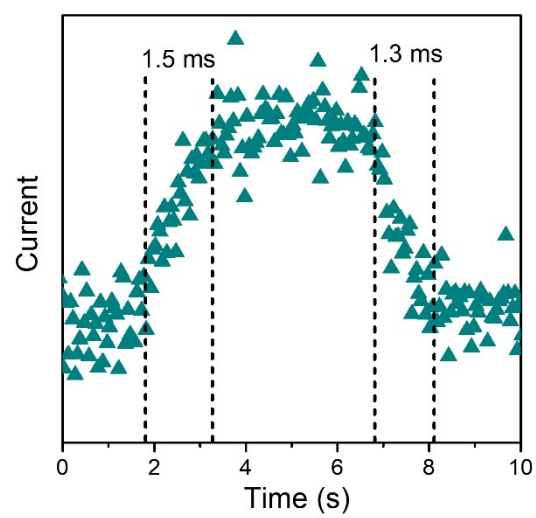

**Fig. S6 Response time of pure SnP<sub>2</sub>S<sub>6</sub> device under 365 nm pulsed laser.**

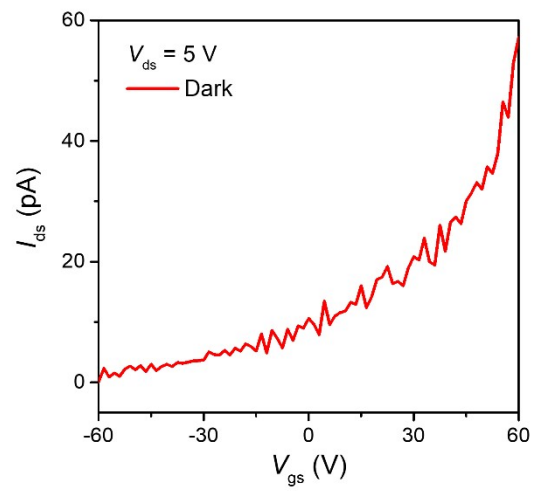

**Fig. S7 Transfer characteristic curve of SnP<sub>2</sub>S<sub>6</sub>/(PEA)<sub>2</sub>PbI<sub>4</sub> heterojunction device under dark condition.**
